# Supplementary material
Source: PubMed Central journal article supplement (PMC6103804)
Supplement: NIHMS978678-supplement-10911_2018_9401_MOESM1_ESM.pdf [file NIHMS978678-supplement-10911_2018_9401_MOESM1_ESM.pdf]

**Supplementary Information**

**Journal of Mammary Gland Biology and Neoplasia**

**Histology and Transcriptome Profiles of the Mammary Gland across Critical Windows of Development**

Kalpana Gopalakrishnan, Susan L. Teitelbaum, James Wetmur, Fabiana Manservisi, Laura Falcioni, Simona Panzacchi, Fiorella Belpoggi, Jia Chen

Correspondence: Jia Chen, Department of Environmental Medicine and Public Health, Icahn School of Medicine at Mount Sinai, Box 1057, 1 Gustave Levy Place, New York, NY 10029, USA. [jia.chen@mssm.edu](mailto:jia.chen@mssm.edu), 212-241-7592

**Table S1. Mouse mammary gland transcriptome datasets used for comparison to rat mammary gland transcriptome.** The column ‘Gene-Sets’ refers to significantly ‘UP’ or ‘DOWN’ regulated genes between adjacent developmental stages made using the GEO2R tool in GEO at FDR 5%, fold change cutoff of 2. For example, ‘Pub Preg DOWN Ron’ indicates genes down-regulated from puberty to pregnancy in the Ron et al, 2007 dataset.

| Developmental Stages                      | Mouse Strain | Sample Size                                                                     | Gene-Sets                        | GEO Series number | Reference                 |
|-------------------------------------------|--------------|---------------------------------------------------------------------------------|----------------------------------|-------------------|---------------------------|
| Puberty, Pregnancy, Lactation, Involution | C57BL/6J     | Puberty (n=3), Pregnancy (n=2), Lactation (n=2), Involution (n=2); Total n=9    | Pub Preg DOWN Ron                | GSE5831           | Ron et al, 2007 [17]      |
|                                           |              |                                                                                 | Pub Preg UP Ron                  |                   |                           |
|                                           |              |                                                                                 | Preg Lact DOWN Ron               |                   |                           |
|                                           |              |                                                                                 | Preg Lact UP Ron                 |                   |                           |
|                                           |              |                                                                                 | Lact Inv DOWN Ron                |                   |                           |
|                                           |              |                                                                                 | Lact Inv UP Ron                  |                   |                           |
| Pregnancy, Lactation, Involution          | FVB          | Pregnancy (n=24), Lactation (n=12), Involution (n=4); Total n=40                | Preg Lact DOWN Anderson          | GSE8191           | Anderson et al, 2007 [26] |
|                                           |              |                                                                                 | Preg Lact UP Anderson            |                   |                           |
|                                           |              |                                                                                 | Lact Inv DOWN Anderson           |                   |                           |
|                                           |              |                                                                                 | Lact Inv UP Anderson             |                   |                           |
| Puberty, Pregnancy, Lactation, Involution | Balb/c       | Puberty (n=9), Pregnancy (n=21), Lactation (n=9), Involution (n=15); Total n=54 | Pub Preg DOWN Stein              | GSE12247          | Stein et al, 2004 [16]    |
|                                           |              |                                                                                 | Pub Preg UP Stein                |                   |                           |
|                                           |              |                                                                                 | Preg Lact DOWN Stein             |                   |                           |
|                                           |              |                                                                                 | Preg Lact UP Stein               |                   |                           |
|                                           |              |                                                                                 | Lact Inv DOWN Stein              |                   |                           |
|                                           |              |                                                                                 | Lact Inv UP Stein                |                   |                           |
| Puberty, 3-7 weeks*                       | CD1          | 3 weeks (n=3), 4 weeks (n=3), 5 weeks (n=2), 6 weeks (n=3), 7                   | MCBRYAN_PUBERTAL_BREAST_3_4WK_DN | GSE6453           | McBryan et al, 2007 [13]  |
|                                           |              |                                                                                 | MCBRYAN_PUBERTAL_BREAST_3_4WK_UP |                   |                           |
|                                           |              |                                                                                 | MCBRYAN_PUBERTAL_BREAST_4_5WK_DN |                   |                           |
|                                           |              |                                                                                 | MCBRYAN_PUBERTAL_BREAST_4_5WK_UP |                   |                           |

|  |  |                               |                                       |  |  |
|--|--|-------------------------------|---------------------------------------|--|--|
|  |  | weeks<br>(n=3);<br>Total n=14 | MCBRYAN_PUBERTAL_<br>BREAST_5_6WK_DN_ |  |  |
|  |  |                               | MCBRYAN_PUBERTAL_<br>BREAST_5_6WK_UP_ |  |  |
|  |  |                               | MCBRYAN_PUBERTAL_<br>BREAST_6_7WK_DN_ |  |  |
|  |  |                               | MCBRYAN_PUBERTAL_<br>BREAST_6_7WK_UP_ |  |  |

\*McBryan gene-sets were directly downloaded from MSigDB [27].

**Table S2. Gene Set Enrichment Analysis of mouse mammary developmental gene-sets with SD rat mammary transcriptome across six windows of development.** A positive enrichment score (ES) indicates that the mouse gene-set is over-represented among genes showing increasing expression profile during rat mammary gland development, while a negative ES indicates that the mouse gene-set is over-represented among genes showing decreasing expression profile during rat mammary gland development. The normalized ES (NES) accounts for differences in gene-set size and in correlations between the gene-set and the expression dataset. FDR is a measure of the proportion of false positives corresponding to each NES.

| <b>Gene-Set Name</b>             | <b>Gene-Set Size</b> | <b>ES</b> | <b>NES</b> | <b>FDR</b> |
|----------------------------------|----------------------|-----------|------------|------------|
| PUB PREG UP STEIN                | 170                  | 0.567     | 3.182      | 0.000      |
| PUB PREG UP RON                  | 95                   | 0.612     | 3.163      | 0.000      |
| MCBRYAN_PUBERTAL_BREAST_4_5WK_UP | 198                  | 0.531     | 3.116      | 0.000      |
| PREG LACT UP ANDERSON            | 131                  | 0.486     | 2.671      | 0.000      |
| MCBRYAN_PUBERTAL_BREAST_3_4WK_UP | 150                  | 0.445     | 2.495      | 0.000      |
| LACT INV DOWN RON                | 156                  | 0.424     | 2.413      | 0.000      |
| PREG LACT UP RON                 | 131                  | 0.425     | 2.365      | 0.000      |
| MCBRYAN_PUBERTAL_BREAST_5_6WK_UP | 72                   | 0.463     | 2.260      | 0.000      |
| PREG LACT UP STEIN               | 155                  | 0.387     | 2.193      | 0.000      |
| LACT INV UP ANDERSON             | 196                  | 0.374     | 2.191      | 0.000      |
| LACT INV DOWN STEIN              | 180                  | 0.381     | 2.163      | 0.000      |
| LACT INV DOWN ANDERSON           | 192                  | 0.248     | 1.438      | 0.018      |
| MCBRYAN_PUBERTAL_BREAST_4_5WK_DN | 113                  | -0.484    | -2.562     | 0.000      |
| PREG LACT DOWN STEIN             | 272                  | -0.337    | -2.036     | 0.000      |
| LACT INV UP STEIN                | 243                  | -0.324    | -1.947     | 0.000      |
| PUB PREG DOWN STEIN              | 192                  | -0.300    | -1.751     | 0.002      |
| MCBRYAN_PUBERTAL_BREAST_5_6WK_DN | 57                   | -0.373    | -1.726     | 0.002      |
| PREG LACT DOWN ANDERSON          | 230                  | -0.244    | -1.445     | 0.034      |
| PUB PREG DOWN RON                | 70                   | -0.293    | -1.416     | 0.037      |
| PREG LACT DOWN RON               | 235                  | -0.234    | -1.395     | 0.039      |
| MCBRYAN_PUBERTAL_BREAST_6_7WK_DN | 49                   | -0.306    | -1.359     | 0.048      |

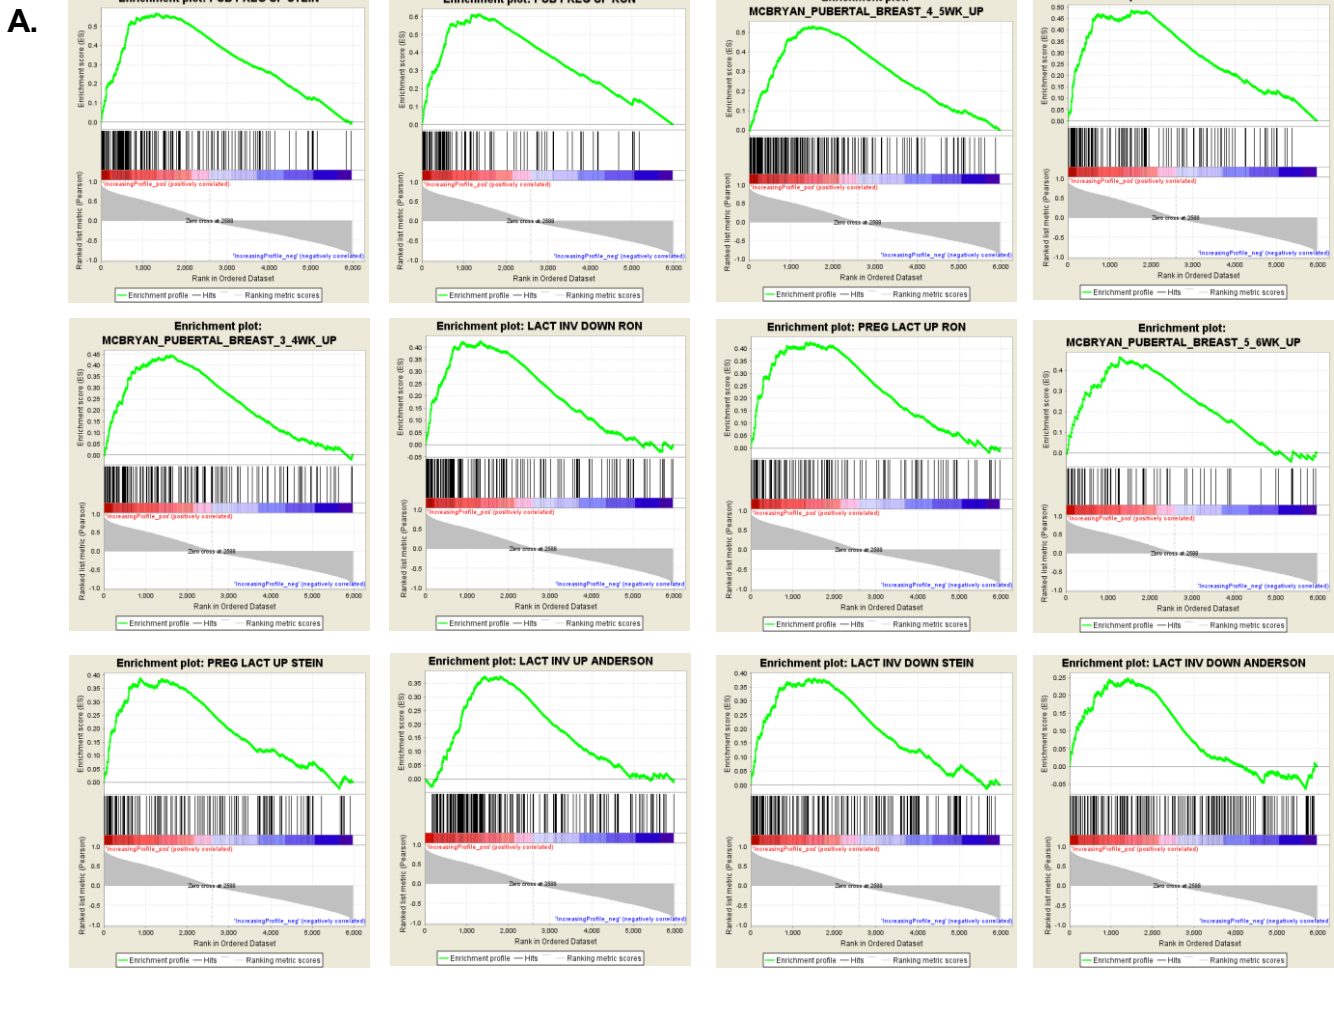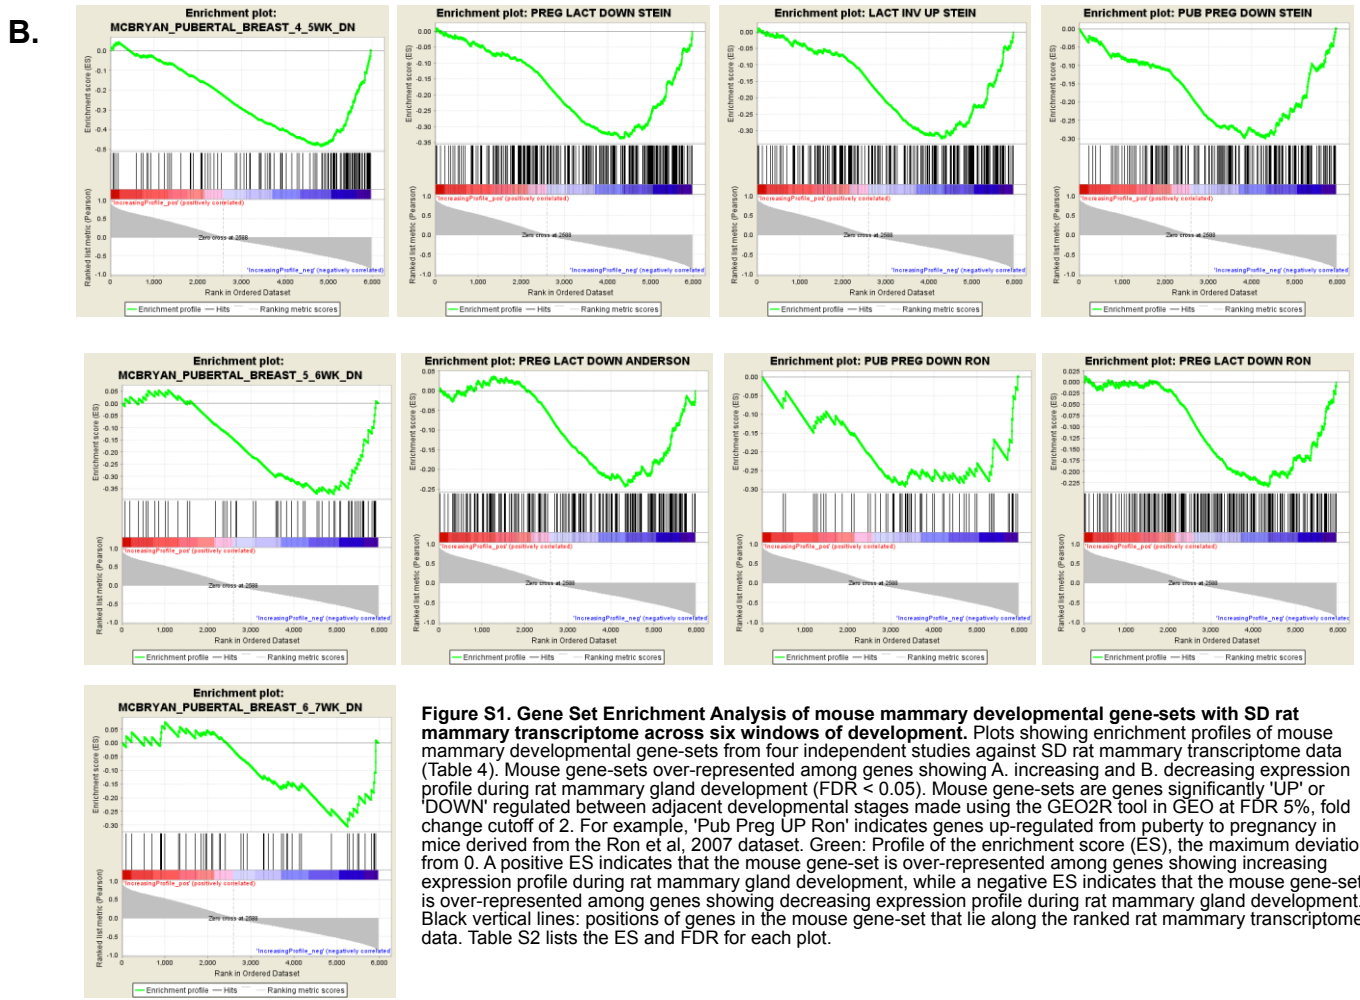

**Figure S1. Gene Set Enrichment Analysis of mouse mammary developmental gene-sets with SD rat mammary transcriptome across six windows of development.** Plots showing enrichment profiles of mouse mammary developmental gene-sets from four independent studies against SD rat mammary transcriptome data (Table 4). Mouse gene-sets over-represented among genes showing A. increasing and B. decreasing expression profile during rat mammary gland development (FDR < 0.05). Mouse gene-sets are genes significantly 'UP' or 'DOWN' regulated between adjacent developmental stages made using the GEO2R tool in GEO at FDR 5%, fold change cutoff of 2. For example, 'Pub Preg UP Ron' indicates genes up-regulated from puberty to pregnancy in mice derived from the Ron et al, 2007 dataset. Green: Profile of the enrichment score (ES), the maximum deviation from 0. A positive ES indicates that the mouse gene-set is over-represented among genes showing increasing expression profile during rat mammary gland development, while a negative ES indicates that the mouse gene-set is over-represented among genes showing decreasing expression profile during rat mammary gland development. Black vertical lines: positions of genes in the mouse gene-set that lie along the ranked rat mammary transcriptome data. Table S2 lists the ES and FDR for each plot.

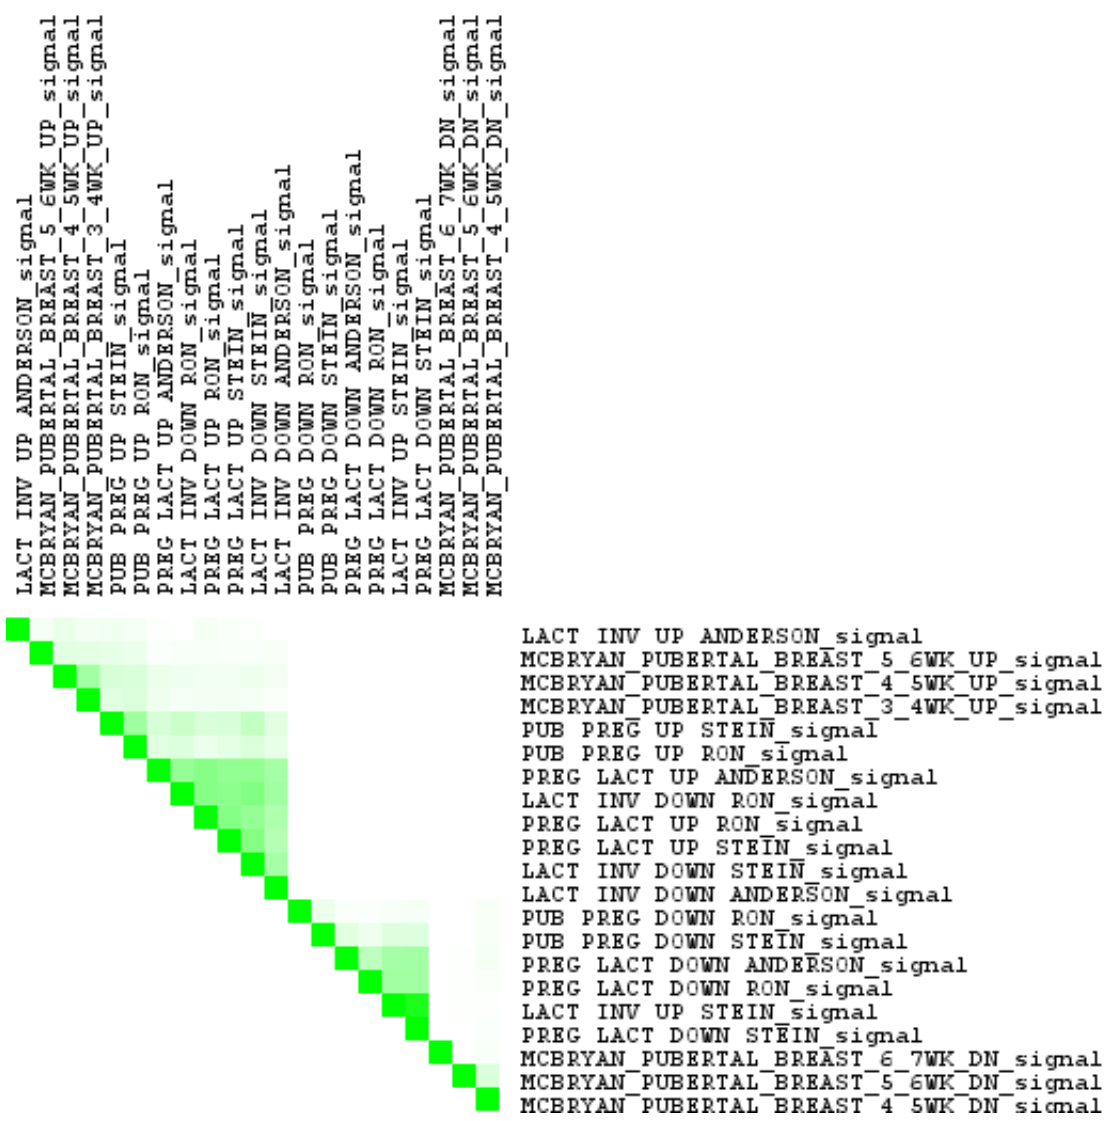

**Figure S2.** Heatmap depicting overlap between mouse gene-sets used for gene set enrichment analysis of mouse mammary gland transcriptome with rat mammary gland transcriptome. More the color intensity, greater the overlap between gene-sets.
